# Supplementary material for: Insights into a Novel blaKPC-2 -Encoding IncP-6 Plasmid Reveal Carbapenem-Resistance Circulation in Several Enterobacteriaceae Species from Wastewater and a Hospital Source in Spain
Source: PubMed Central journal article supplement (PMC5487458; doi:10.3389/fmicb.2017.01143), 2017-06-28
Supplement: Data_Sheet_1.pdf [file Data_Sheet_1.pdf]

## *Supplementary Material*

### **Insights into the circulation of carbapenem resistance in *Enterobacteriaceae* from wastewater and a hospital source in Spain by a novel *bla*<sub>KPC-2</sub> encoding IncP-6 plasmid**

**Yancheng Yao**<sup>1,†</sup>, **Fernando Lazaro-Perona**<sup>2,†</sup>, **Linda Falgenhauer**<sup>1</sup>, **Aránzazu Valverde**<sup>4,5</sup>, **Can Imirzalioglu**<sup>1</sup>, **Lucas Dominguez**<sup>4</sup>, **Rafael Cantón**<sup>3,5</sup>, **Jesús Mingorance**<sup>2,5</sup>, **Trinad Chakraborty**<sup>1,\*</sup>

<sup>1</sup> Institute of Medical Microbiology, Justus Liebig University Giessen, and German Center for Infection Research (DZIF), Partner Site Giessen-Marburg-Langen, Campus Giessen, Giessen, Germany

<sup>2</sup> Servicio de Microbiología. Hospital Universitario La Paz and Instituto de Investigaciones Sanitarias Hospital La Paz (IdiPAZ). Madrid, Spain

<sup>3</sup> Servicio de Microbiología. Hospital Universitario Ramón y Cajal and Instituto Ramón y Cajal de Investigaciones Sanitarias (IRYCIS). Madrid, Spain

<sup>4</sup> Centro de Vigilancia Sanitaria Veterinaria (VISAVET). Universidad Complutense, Madrid, Spain

<sup>5</sup> Red Española de Investigación en Patología Infecciosa Spain (REIPI), Madrid, Spain

<sup>†</sup> These authors contributed equally to the manuscript.

**\* Correspondence:**

Trinad Chakraborty

Trinad.chakraborty@mikrobio.med.uni-giessen.de

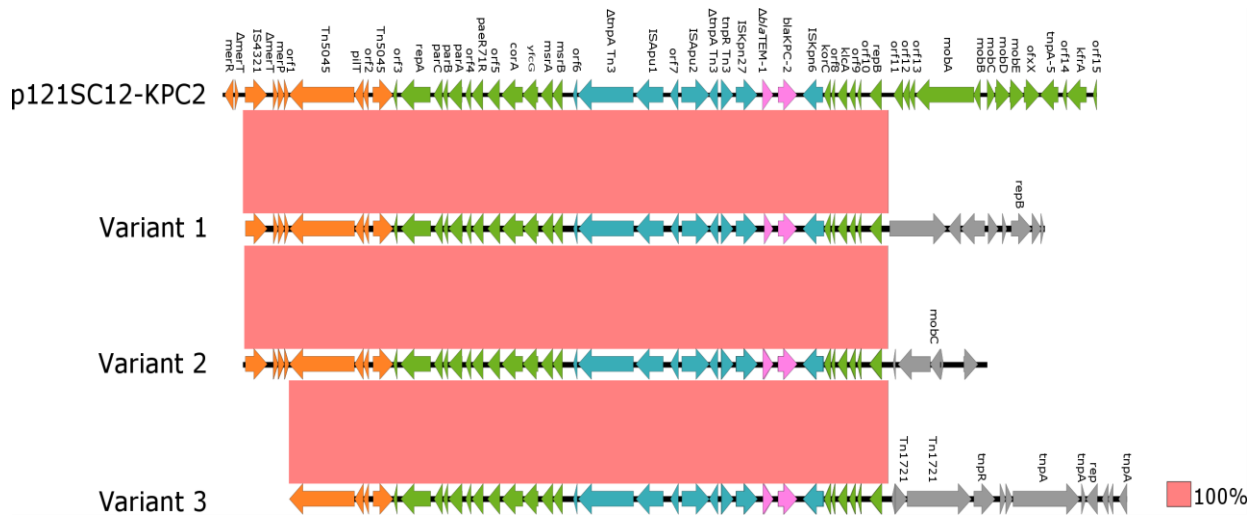

**Supplementary Figure 1: Diversity of IncP-6 KPC2-Plasmids in Wastewater.** Three different incomplete IncP-6 plasmids presented a 30kb common region with the p121SC21-KPC2 and the major variations related with insertions in the region of mobilization upstream of *repB* gene, suggest an active process of recombination. Variant 1 present in isolate 121SC10 and 121SC39, variant 2 in 121SC57 and variant 3 in 121SC85.

|                                   | KPC-2 positive/ total sequenced | IncP-6 closed | IncP-6 derivates | IncN | IncU | IncX3 | other |
|-----------------------------------|---------------------------------|---------------|------------------|------|------|-------|-------|
| <i>Citrobacter freundii</i>       | 5/ 5                            | ● ● ●         |                  | ○    | ○    |       |       |
| <i>Citrobacter braakii</i>        | 1/ 1                            |               | ○                |      |      |       |       |
| <i>Citrobacter farmeri</i>        | 1/ 1                            | ●             |                  |      |      |       |       |
| <i>Enterobacter cloacae</i>       | 4/ 4                            | ● ● ● ●       |                  |      |      |       |       |
| <i>Enterobacter asburiae</i>      | 1/ 1                            |               |                  |      |      |       | ○     |
| <i>Klebsiella oxytoca</i>         | 5/ 6                            | ● ●           | ○                | ○    |      | ●     |       |
| <i>Klebsiella pneumoniae</i>      | 1/ 1                            |               |                  | ○    |      |       |       |
| <i>Kluyvera ascorbata</i>         | 1/ 1                            |               | ●                |      |      |       |       |
| <i>Kluyvera cryocrescens</i>      | 2/ 2                            | ● ●           |                  |      |      |       |       |
| <i>Raoultella ornithinolytica</i> | 3/ 3                            |               | ● ● ●            |      |      |       |       |
|                                   | 24/25                           |               |                  |      |      |       |       |

Solid- and hollow- circle indicate complete and gaped plasmid sequence, respectively.

● isolates from 2011 ● isolates from 2012 ● isolates from 2013

**Supplementary Figure 2: Detected KPC2-Plasmids in Wastewater.** We determined the *bla*<sub>KPC-2</sub> gene in 24 of 25 sequenced wastewater isolates. The KPC-2 was predominantly present in an IncP-6 plasmid distributed in eight *Enterobacteriaceae* species.

**Supplementary Table 1: KPC-2 isolates (n=46)**

| KPC-2 positive isolates obtained from the urban effluent between 2011 and 2013 and from an outbreak at a hospital in Madrid 2009-2010 |      |                                   |               |                                             |                               |                |             |           |
|---------------------------------------------------------------------------------------------------------------------------------------|------|-----------------------------------|---------------|---------------------------------------------|-------------------------------|----------------|-------------|-----------|
| ISOLATE                                                                                                                               | Year | Microorganism                     | Carbapenemase | Plasmid size based on s1-hybridization (kb) | Transconjugant Size (kb)<br>* | Source         | Institution | sequenced |
| 121SC10                                                                                                                               | 2012 | <i>Raoultella ornithinolytica</i> | KPC-2         | 50                                          | 50                            | urban effluent | VISAVET     | 1         |
| 121SC13                                                                                                                               | 2012 | <i>Citrobacter farmeri</i>        | KPC-2         | ND                                          | NO TC                         | urban effluent | VISAVET     | 1         |
| 121SC2                                                                                                                                | 2012 | <i>Enterobacter asburiae</i>      | KPC-2         | ND                                          | NO TC                         | urban effluent | VISAVET     |           |
| 121SC21                                                                                                                               | 2012 | <i>Citrobacter freundii</i>       | KPC-2         | 50                                          | NO TC                         | urban effluent | VISAVET     | 1         |
| 121SC25                                                                                                                               | 2012 | <i>Citrobacter freundii</i>       | KPC-2         | ND                                          | ND                            | urban effluent | VISAVET     |           |
| 121SC29                                                                                                                               | 2012 | <i>Raoultella ornithinolytica</i> | KPC-2         | ND                                          | ND                            | urban effluent | VISAVET     |           |
| 121SC3                                                                                                                                | 2012 | <i>Enterobacter asburiae</i>      | KPC-2         | ND                                          | ND                            | urban effluent | VISAVET     | 1         |
| 121SC32                                                                                                                               | 2012 | <i>Enterobacter asburiae</i>      | KPC-2         | 50                                          | NO TC                         | urban effluent | VISAVET     | 1         |
| 121SC33                                                                                                                               | 2012 | <i>Citrobacter freundii</i>       | KPC-2         | ND                                          | NO TC                         | urban effluent | VISAVET     |           |
| 121SC37                                                                                                                               | 2012 | <i>Citrobacter freundii</i>       | KPC-2         | 50                                          | NO TC                         | urban effluent | VISAVET     |           |
| 121SC39                                                                                                                               | 2012 | <i>Raoultella ornithinolytica</i> | KPC-2         | 50                                          | 50                            | urban effluent | VISAVET     | 1         |
| 121SC5                                                                                                                                | 2012 | <i>Raoultella ornithinolytica</i> | KPC-2         | 60                                          | NO TC                         | urban effluent | VISAVET     |           |
| 121SC53                                                                                                                               | 2012 | <i>Enterobacter asburiae</i>      | KPC-2         | ND                                          | NO TC                         | urban effluent | VISAVET     |           |
| 121SC54                                                                                                                               | 2012 | <i>Citrobacter freundii</i>       | KPC-2         | 50                                          | 50                            | urban effluent | VISAVET     | 1         |
| 121SC57                                                                                                                               | 2012 | <i>Citrobacter braakii</i>        | KPC-2         | ND                                          | NO TC                         | urban effluent | VISAVET     | 1         |
| 121SC58                                                                                                                               | 2012 | <i>Citrobacter freundii</i>       | KPC-2         | 50                                          | NO TC                         | urban effluent | VISAVET     |           |
| 121SC6                                                                                                                                | 2012 | <i>Citrobacter freundii</i>       | KPC-2         | 50                                          | NO TC                         | urban effluent | VISAVET     |           |
| 121SC62                                                                                                                               | 2012 | <i>Enterobacter asburiae</i>      | KPC-2         | ND                                          | ND                            | urban effluent | VISAVET     |           |
| 121SC65                                                                                                                               | 2012 | <i>Klebsiella pneumoniae</i>      | KPC-2         | 70                                          | NO TC                         | urban effluent | VISAVET     | 1         |
| 121SC66                                                                                                                               | 2012 | <i>Klebsiella oxytoca</i>         | KPC-2         | ND                                          | NO TC                         | urban effluent | VISAVET     | 1         |
| 121SC68                                                                                                                               | 2012 | <i>Kluyvera cryocrescens</i>      | KPC-2         | 50                                          | NO TC                         | urban effluent | VISAVET     | 1         |

|          |      |                                   |       |        |       |                  |           |   |
|----------|------|-----------------------------------|-------|--------|-------|------------------|-----------|---|
| 121SC7   | 2012 | <i>Klebsiella oxytoca</i>         | KPC-2 | ND     | ND    | urban effluent   | VISAVET   | 1 |
| 121SC72  | 2012 | <i>Klebsiella oxytoca</i>         | KPC-2 | ND     | NO TC | urban effluent   | VISAVET   | 1 |
| 121SC73  | 2012 | <i>Citrobacter freundii</i>       | KPC-2 | 70     | NO TC | urban effluent   | VISAVET   | 1 |
| 121SC80  | 2012 | <i>Citrobacter freundii</i>       | KPC-2 | ND     | ND    | urban effluent   | VISAVET   |   |
| 121SC81  | 2012 | <i>Raoultella ornithinolytica</i> | KPC-2 | ND     | ND    | urban effluent   | VISAVET   |   |
| 121SC84  | 2012 | <i>Raoultella ornithinolytica</i> | KPC-2 | ND     | NO TC | urban effluent   | VISAVET   |   |
| 121SC85  | 2012 | <i>Klebsiella oxytoca</i>         | KPC-2 | ND     | ND    | urban effluent   | VISAVET   | 1 |
| 131SC19  | 2013 | <i>Enterobacter asburiae</i>      | KPC-2 | ND     | ND    | urban effluent   | VISAVET   | 1 |
| 131SC2   | 2013 | <i>Raoultella ornithinolytica</i> | KPC-2 | ND     | ND    | urban effluent   | VISAVET   | 1 |
| 131SC23  | 2013 | <i>Citrobacter freundii</i>       | KPC-2 | ND     | ND    | urban effluent   | VISAVET   |   |
| 131SC24  | 2013 | <i>Klebsiella oxytoca</i>         | KPC-2 | ND     | ND    | urban effluent   | VISAVET   | 1 |
| 131SC31  | 2013 | <i>Citrobacter freundii</i>       | KPC-2 | ND     | ND    | urban effluent   | VISAVET   | 1 |
| 131SC4   | 2013 | <i>Klebsiella oxytoca</i>         | KPC-2 | ND     | ND    | urban effluent   | VISAVET   | 1 |
| 131SC42  | 2013 | <i>Citrobacter freundii</i>       | KPC-2 | ND     | ND    | urban effluent   | VISAVET   |   |
| 131SC48  | 2013 | <i>Enterobacter asburiae</i>      | KPC-2 | ND     | ND    | urban effluent   | VISAVET   | 1 |
| 131SC8   | 2013 | <i>Kluyvera ascorbata</i>         | KPC-2 | ND     | ND    | urban effluent   | VISAVET   | 1 |
| 37C1     | 2011 | <i>Citrobacter freundii</i>       | KPC-2 | 40     | NO TC | urban effluent   | VISAVET   |   |
| 51CX1    | 2011 | <i>Citrobacter freundii</i>       | KPC-2 | 40     | NO TC | urban effluent   | VISAVET   |   |
| 72CX1    | 2011 | <i>Citrobacter freundii</i>       | KPC-2 | 40     | NO TC | urban effluent   | VISAVET   |   |
| 74CX1    | 2011 | <i>Citrobacter freundii</i>       | KPC-2 | 40     | NO TC | urban effluent   | VISAVET   | 1 |
| 88cz1    | 2011 | <i>Kluyvera cryocrescens</i>      | KPC-2 | 40/300 | NO TC | urban effluent   | VISAVET   | 1 |
| 93CX1    | 2011 | <i>Enterobacter cloacae</i>       | KPC-2 | 40     | NO TC | urban effluent   | VISAVET   | 1 |
| 1001697  | 2010 | <i>Citrobacter freundii</i>       | KPC-2 | 50     | NO TC | clinical isolate | H. La Paz | 1 |
| 09064836 | 2009 | <i>Citrobacter freundii</i>       | KPC-2 | 50     | NO TC | clinical isolate | H. La Paz | 1 |
| 10000126 | 2010 | <i>Citrobacter freundii</i>       | KPC-2 | 50     | NO TC | clinical isolate | H. La Paz | 1 |

\*, conjugation experiments were only performed for the isolates from 2011 and 2012 using recipient strain, *E. coli* BM21 (Nalidixic and Rifampin resistant). NO TC indicates that the conjugation experiment failed and ND not determined, Even in the cases of conjugation failure, the hybridization with an specific probe for blaKPC-2 was done and the result is indicated in the column S1 nuclease.

**Supplementary Table 2: Sequencing results**

| Isolate  | Microorganism                     | Year | Source         | GC content (%) | N50    | Contigs | Total of contigs | Read_length | Reads count | Total matched bases | Average Coverage | Sample accession | Secondary accession | Run accession |
|----------|-----------------------------------|------|----------------|----------------|--------|---------|------------------|-------------|-------------|---------------------|------------------|------------------|---------------------|---------------|
| 9064836  | <i>Citrobacter freundii</i>       | 2009 | clinical       | 51.9           | 147184 | 162     | 5457494          | 183.34      | 4830238     | 639680647           | 117              | ERS1696190       | SAMEA104032297      | ERR1950605    |
| 10000126 | <i>Citrobacter freundii</i>       | 2010 | clinical       | 51.9           | 168550 | 121     | 5422873          | 177.45      | 8598616     | 1113253923          | 205              | ERS1696191       | SAMEA104032298      | ERR1950606    |
| 10016917 | <i>Citrobacter freundii</i>       | 2010 | clinical       | 51.8           | 181586 | 126     | 5396670          | 182.10      | 5796626     | 822604837           | 152              | ERS1696192       | SAMEA104032299      | ERR1950607    |
| 74CX1    | <i>Citrobacter freundii</i>       | 2011 | urban effluent | 51.9           | 128562 | 124     | 5122138          | 183.41      | 5806124     | 841826099           | 164              | ERS1696189       | SAMEA104032296      | ERR1950604    |
| 121SC21  | <i>Citrobacter freundii</i>       | 2012 | urban effluent | 51.6           | 81928  | 173     | 5520208          | 175.66      | 5523492     | 835732399           | 151              | ERS1696268       | SAMEA104032375      | ERR1950683    |
| 121SC54  | <i>Citrobacter freundii</i>       | 2012 | urban effluent | 51.8           | 74540  | 220     | 5163958          | 152.89      | 11566822    | 1151473983          | 223              | ERS1696272       | SAMEA104032379      | ERR1950687    |
| 121SC73  | <i>Citrobacter freundii</i>       | 2012 | urban effluent | 51.6           | 180850 | 113     | 5401577          | 173.47      | 8381070     | 1129536386          | 209              | ERS1696278       | SAMEA104032385      | ERR1950693    |
| 131SC31  | <i>Citrobacter freundii</i>       | 2013 | urban effluent | 51.8           | 98982  | 135     | 5000525          | 168.35      | 8903466     | 1256276522          | 251              | ERS1696284       | SAMEA104032391      | ERR1950699    |
| 121SC57  | <i>Citrobacter braakii</i>        | 2012 | urban effluent | 52.1           | 110562 | 151     | 5283838          | 193.10      | 3651470     | 685351526           | 130              | ERS1696273       | SAMEA104032380      | ERR1950688    |
| 121SC13  | <i>Citrobacter farmeri</i>        | 2012 | urban effluent | 52.8           | 169462 | 132     | 5444896          | 185.25      | 4781478     | 858801658           | 158              | ERS1696267       | SAMEA104032374      | ERR1950682    |
| 121SC3   | <i>Enterobacter asburiae</i>      | 2012 | urban effluent | 54.4           | 102335 | 154     | 5275901          | 181.00      | 3598944     | 626166160           | 119              | ERS1696269       | SAMEA104032376      | ERR1950684    |
| 121SC32  | <i>Enterobacter asburiae</i>      | 2012 | urban effluent | 55.8           | 95772  | 144     | 4900317          | 185.03      | 2969666     | 533591321           | 109              | ERS1696270       | SAMEA104032377      | ERR1950685    |
| 131SC19  | <i>Enterobacter asburiae</i>      | 2013 | urban effluent | 55.6           | 93831  | 175     | 4782468          | 183.40      | 3493378     | 617498154           | 129              | ERS1696281       | SAMEA104032388      | ERR1950696    |
| 131SC48  | <i>Enterobacter asburiae</i>      | 2013 | urban effluent | 55.4           | 74566  | 175     | 5045048          | 181.07      | 3472124     | 606447632           | 120              | ERS1696285       | SAMEA104032392      | ERR1950700    |
| 93CX1    | <i>Enterobacter cloacae</i>       | 2011 | urban effluent | 54.7           | 78763  | 171     | 5112135          | 174.78      | 4616324     | 766108155           | 150              | ERS1696288       | SAMEA104032395      | ERR1950703    |
| 121SC07  | <i>Klebsiella oxytoca</i>         | 2012 | urban effluent | 55.5           | 75531  | 226     | 6080824          | 179.43      | 6771958     | 964297833           | 159              | ERS1696265       | SAMEA104032372      | ERR1950680    |
| 121SC66  | <i>Klebsiella oxytoca</i>         | 2012 | urban effluent | 55.8           | 93845  | 237     | 6644824          | 177.18      | 7239422     | 1031939813          | 155              | ERS1696275       | SAMEA104032382      | ERR1950690    |
| 121SC72  | <i>Klebsiella oxytoca</i>         | 2012 | urban effluent | 55.7           | 101687 | 165     | 6494558          | 172.99      | 9024738     | 1372538926          | 211              | ERS1696277       | SAMEA104032384      | ERR1950692    |
| 121SC85  | <i>Klebsiella oxytoca</i>         | 2012 | urban effluent | 55.6           | 100855 | 201     | 6210499          | 163.04      | 8697124     | 1229782113          | 198              | ERS1696279       | SAMEA104032386      | ERR1950694    |
| 131SC04  | <i>Klebsiella oxytoca</i>         | 2013 | urban effluent | 55.5           | 93868  | 189     | 6192754          | 195.20      | 2474682     | 390697967           | 63               | ERS1696280       | SAMEA104032387      | ERR1950695    |
| 131SC24  | <i>Klebsiella oxytoca</i>         | 2013 | urban effluent | 55.7           | 101669 | 157     | 6270776          | 155.14      | 7985718     | 1098494031          | 175              | ERS1696283       | SAMEA104032390      | ERR1950698    |
| 121SC65  | <i>Klebsiella pneumoniae</i>      | 2012 | urban effluent | 57.0           | 62666  | 242     | 5568593          | 180.85      | 3971586     | 631596771           | 113              | ERS1696274       | SAMEA104032381      | ERR1950689    |
| 131SC8   | <i>Kluyvera ascorbata</i>         | 2013 | urban effluent | 53.6           | 79930  | 181     | 5511169          | 173.88      | 3833918     | 632886374           | 115              | ERS1696286       | SAMEA104032393      | ERR1950701    |
| 88CZ1    | <i>Kluyvera cryocrescens</i>      | 2011 | urban effluent | 53.6           | 187948 | 97      | 5255144          | 177.67      | 4905944     | 826624124           | 157              | ERS1696287       | SAMEA104032394      | ERR1950702    |
| 121SC68  | <i>Kluyvera cryocrescens</i>      | 2012 | urban effluent | 53.6           | 105247 | 153     | 5209659          | 167.52      | 3706848     | 587882933           | 113              | ERS1696276       | SAMEA104032383      | ERR1950691    |
| 121SC10  | <i>Raoultella ornithinolytica</i> | 2012 | urban effluent | 54.7           | 107811 | 144     | 6502063          | 183.05      | 6542840     | 1007807096          | 155              | ERS1696266       | SAMEA104032373      | ERR1950681    |
| 121SC39  | <i>Raoultella ornithinolytica</i> | 2012 | urban effluent | 55.0           | 130169 | 126     | 6079398          | 182.08      | 4614396     | 805517527           | 132              | ERS1696271       | SAMEA104032378      | ERR1950686    |
| 131SC2   | <i>Raoultella ornithinolytica</i> | 2013 | urban effluent | 55.3           | 96097  | 195     | 6149508          | 180.23      | 3727140     | 640163211           | 104              | ERS1696282       | SAMEA104032389      | ERR1950697    |

Supplementary Table 3: Plasmids and Resistance genes

| Isolate  | Microorganism                     | Year | Plasmid size based on s1-hybridization (kb) * | Genome in silico MLST   | Sequence of bla <sub>KPC-2</sub> | Plasmids                   |                               |                                         |                     |             |       | Antibiotic Resistance Genes |       |            |            |                      |                        |                       |                      |                       |                       |                    |                       |        |        |      |                        |
|----------|-----------------------------------|------|-----------------------------------------------|-------------------------|----------------------------------|----------------------------|-------------------------------|-----------------------------------------|---------------------|-------------|-------|-----------------------------|-------|------------|------------|----------------------|------------------------|-----------------------|----------------------|-----------------------|-----------------------|--------------------|-----------------------|--------|--------|------|------------------------|
|          |                                   |      |                                               |                         |                                  | KPC-2 plasmid type IncP(6) | KPC-2 plasmid other Inc Types | Plasmid-1919 bp                         | Additional plasmids | aac(6)/b-cr | aacA4 | aadA1                       | aadA2 | aadA7      | aph(3')-Ia | bla <sub>KPC-2</sub> | Δbla <sub>TEM-1A</sub> | bla <sub>OXA-10</sub> | bla <sub>BEL-1</sub> | bla <sub>CTX-M</sub>  | bla <sub>FOX</sub>    | bla <sub>OXY</sub> | other beta-lactamases | catB2  | dfrA   | fosA | mph(A)                 |
| 9064836  | <i>Citrobacter freundii</i>       | 2009 | 50                                            | Unknown ST              | +                                | +                          | +                             | IncFI, IncFII                           | ✓                   | ✓           |       | ✓                           | ✓     | ✓          | ✓          | ✓                    | ✓                      | CTX-M-53              | bla <sub>FOX-4</sub> | bla <sub>CMY-71</sub> |                       | dfrA12             | ✓                     | QnrB43 | ✓      | ✓    | aac(3)-IIa, aac(6')-31 |
| 10016917 | <i>Citrobacter freundii</i>       | 2010 | 50                                            | Unknown ST              | +                                | +                          | +                             | IncFI, IncFII                           |                     |             |       | ✓                           | ✓     | ✓          | ✓          | ✓                    |                        |                       |                      | bla <sub>CMY-71</sub> |                       |                    | ✓                     | QnrB43 | ✓      | ✓    | aac(3)-IIa, aac(6')-31 |
| 10000126 | <i>Citrobacter freundii</i>       | 2010 | 50                                            | Unknown ST              | -                                |                            | +                             | IncFI, IncFII, Col (Ye4449)             | ✓                   | ✓           |       | ✓                           | ✓     | ✓          | ✓          | ✓                    |                        | CTX-M-53              |                      | bla <sub>CMY-71</sub> |                       | dfrA12             | ✓                     | QnrB43 | ✓      | ✓    | aac(3)-IIa, aac(6')-31 |
| 74CX1    | <i>Citrobacter freundii</i>       | 2011 | 40                                            | Unknown ST              | +                                | +                          |                               |                                         |                     |             |       |                             |       |            | ✓          | ✓                    |                        |                       |                      | bla <sub>CMY-2</sub>  |                       |                    |                       |        | QnrB32 |      |                        |
| 121SC21  | <i>Citrobacter freundii</i>       | 2012 | 50                                            | Unknown ST              | +                                | +                          |                               | IncN [ST-9]                             | ✓                   |             |       |                             |       |            | ✓          | ✓                    | bla <sub>OXA-1</sub>   |                       |                      | bla <sub>CMY-41</sub> | catB3                 |                    |                       | ✓      |        | ✓    | ARR-3                  |
| 121SC54  | <i>Citrobacter freundii</i>       | 2012 | 50 *                                          | Unknown ST              | +                                |                            |                               | IncN                                    | ✓                   | ✓           |       |                             |       |            | ✓          | ✓                    | ✓                      |                       | bla <sub>FOX-3</sub> | bla <sub>CMY-41</sub> |                       |                    |                       |        |        |      |                        |
| 121SC73  | <i>Citrobacter freundii</i>       | 2012 | 70                                            | Unknown ST              | +                                |                            |                               | IncU                                    | ✓                   | ✓           |       |                             |       |            | ✓          |                      |                        |                       | bla <sub>FOX-7</sub> | bla <sub>CMY-73</sub> |                       |                    |                       |        | QnrB49 | ✓    |                        |
| 131SC31  | <i>Citrobacter freundii</i>       | 2013 | ND                                            | Unknown ST              | +                                | +                          | +                             | IncFI, IncN2, Col (Ye4449)              | ✓                   | ✓           | ✓     |                             |       | ✓          | ✓          | ✓                    |                        |                       |                      | bla <sub>CMY-79</sub> |                       | dfrA1              | ✓                     |        |        | ✓    |                        |
| 121SC57  | <i>Citrobacter braakii</i>        | 2012 | ND                                            | Unknown ST              | +                                | +                          |                               | IncFI, IncN, IncR                       | ✓                   | ✓           |       |                             |       |            | ✓          | ✓                    | ✓                      | ✓                     |                      | bla <sub>CMY-70</sub> |                       |                    |                       |        | QnrB40 |      |                        |
| 121SC13  | <i>Citrobacter farmeri</i>        | 2012 | ND                                            | NA                      | +                                | +                          |                               | IncN2                                   |                     |             |       |                             |       |            | ✓          | ✓                    |                        |                       |                      | bla <sub>IIMP-8</sub> |                       |                    |                       | ✓      | QnrS2  | ✓    |                        |
| 121SC3   | <i>Enterobacter asburiae</i>      | 2012 | ND                                            | Unknown ST              | +                                | +                          |                               | IncFI, IncHI2                           | ✓                   | ✓           |       |                             |       | ✓          | ✓          |                      |                        |                       |                      |                       |                       |                    | ✓                     | QnrA1  | ✓      |      | aadB                   |
| 121SC32  | <i>Enterobacter asburiae</i> #    | 2012 | 50                                            | <i>E. cloacae</i> ST-23 | +                                | +                          | +                             | ColRNAI                                 | ✓                   | ✓           |       |                             |       |            | ✓          | ✓                    | ✓                      |                       |                      | bla <sub>ACT-1</sub>  |                       | ✓                  | ✓                     |        | ✓      |      | dfrB3                  |
| 131SC19  | <i>Enterobacter asburiae</i> #    | 2013 | ND                                            | <i>E. cloacae</i> ST-23 | +                                | +                          |                               | IncN2                                   | ✓                   | ✓           |       |                             |       |            | ✓          | ✓                    | bla <sub>OXA-2</sub>   |                       |                      | bla <sub>ACT-1</sub>  |                       |                    | ✓                     |        |        | ✓    |                        |
| 131SC48  | <i>Enterobacter asburiae</i> #    | 2013 | ND                                            | <i>E. cloacae</i> ST-23 | +                                | +                          |                               |                                         | ✓                   | ✓           |       |                             |       |            | ✓          | ✓                    | bla <sub>OXA-2</sub>   |                       |                      | bla <sub>ACT-1</sub>  |                       |                    | ✓                     |        |        | ✓    |                        |
| 93CX1    | <i>Enterobacter cloacae</i>       | 2011 | 40                                            | Unknown ST              | +                                | +                          |                               | IncX3, repA (pKPC-2)                    |                     |             | ✓     |                             |       |            | ✓          | ✓                    |                        |                       |                      |                       |                       |                    | ✓                     |        |        |      |                        |
| 121SC07  | <i>Klebsiella oxytoca</i>         | 2012 | ND                                            | ST-77                   | +                                | +                          |                               | IncFI, IncFII, IncQ2, IncU, Col(Ye4449) | ✓                   | ✓           |       |                             |       |            | ✓          | ✓                    | ✓                      |                       | bla <sub>FOX-3</sub> | OXY-5-2               |                       |                    |                       |        |        |      |                        |
| 121SC66  | <i>Klebsiella oxytoca</i>         | 2012 | ND                                            | ST-50                   | -                                |                            |                               | IncFI, IncFII, IncU                     |                     |             |       | ✓                           |       |            |            |                      |                        | ✓                     |                      | OXY-1-2               | bla <sub>GES-5</sub>  |                    |                       |        |        | ✓    |                        |
| 121SC72  | <i>Klebsiella oxytoca</i>         | 2012 | ND                                            | Unknown ST              | +                                | +                          | +                             | IncL/M, Col(IRGK)                       | ✓                   | ✓           |       | ✓                           |       | aph(3')-Ic | ✓          | ✓                    |                        |                       |                      | OXY-1-5               |                       |                    |                       |        |        | ✓    | aac(3)-I, cmlA1        |
| 121SC85  | <i>Klebsiella oxytoca</i>         | 2012 | ND                                            | Unknown ST              | +                                | +                          | +                             | IncFI, IncFII, ColE10                   | ✓                   | ✓           |       |                             |       |            | ✓          | ✓                    | ✓                      | ✓                     |                      |                       |                       |                    |                       |        |        | ✓    | aac(3)-Ib, strA        |
| 131SC04  | <i>Klebsiella oxytoca</i>         | 2013 | ND                                            | Unknown ST              | +                                |                            |                               | IncN [ST-6]                             |                     |             |       |                             |       |            | ✓          |                      |                        |                       |                      | OXY-5-1               |                       | dfrA14             |                       |        | QnrS1  |      |                        |
| 131SC24  | <i>Klebsiella oxytoca</i>         | 2013 | ND                                            | ST-135                  | +                                |                            |                               | IncX3                                   |                     |             |       | ✓                           |       |            | ✓          | ✓                    | ✓                      |                       |                      | OXY-1-3               |                       |                    |                       |        |        |      |                        |
| 121SC65  | <i>Klebsiella pneumoniae</i>      | 2012 | 70                                            | ST-1200                 | +                                |                            |                               | IncN [ST-7]                             |                     |             |       |                             |       |            | ✓          |                      |                        |                       |                      |                       | bla <sub>SHV-82</sub> | dfrA14             | ✓                     | QnrS1  |        |      | oqxA, oqxB             |
| 131SC8   | <i>Kluyvera ascorbata</i>         | 2013 | ND                                            | NA                      | +                                | +                          |                               | IncFI, IncHI1, Col (MGD2)               | ✓                   |             | ✓     |                             |       |            | ✓          | ✓                    | bla <sub>OXA-9</sub>   | CTX-M-5               |                      |                       |                       |                    |                       |        | QnrS1  |      | aac(6')-Ib             |
| 88CZ1    | <i>Kluyvera cryocrescens</i>      | 2011 | 40/300                                        | NA                      | +                                | +                          |                               |                                         |                     |             |       |                             |       |            | ✓          | ✓                    |                        |                       |                      |                       |                       |                    |                       |        |        |      |                        |
| 121SC68  | <i>Kluyvera cryocrescens</i>      | 2012 | 50                                            | NA                      | +                                | +                          |                               | Col(IRGK)                               |                     |             |       |                             |       |            | ✓          | ✓                    |                        |                       |                      |                       |                       |                    |                       |        |        |      |                        |
| 121SC10  | <i>Raoultella ornithinolytica</i> | 2012 | 50 *                                          | NA                      | +                                | +                          | +                             | IncHI1 [ST-11], IncN[ST-7], Col(MGD2)   | ✓                   | ✓           | ✓     |                             |       | aph(3')-XV | ✓          | ✓                    |                        |                       |                      | bla <sub>VIM-1</sub>  | ✓                     |                    |                       |        |        |      |                        |
| 121SC39  | <i>Raoultella ornithinolytica</i> | 2012 | 50 *                                          | NA                      | +                                | +                          |                               | IncFIA, IncN[ST-7]                      | ✓                   | ✓           | ✓     |                             |       | aph(3')-XV | ✓          | ✓                    |                        |                       |                      | bla <sub>VIM-1</sub>  | ✓                     | dfrA14             | ✓                     | ✓      | QnrS1  | ✓    |                        |
| 131SC2   | <i>Raoultella ornithinolytica</i> | 2013 | ND                                            | NA                      | +                                | +                          |                               | IncFIA, IncA/C, ColRNAI                 | ✓                   | ✓           | ✓     |                             |       |            | ✓          | ✓                    |                        | ✓                     |                      |                       | ✓                     |                    | ✓                     |        |        | ✓    |                        |

\*, transconjugants were obtained and contained a 50 Kb plasmid; #, belonged to *E. cloacae* based on genome analysis.
